# Supplementary material
Source: PubMed Central journal article supplement (PMC5683179)
Supplement: NIHMS866874-supplement-supp_info.pdf [file NIHMS866874-supplement-supp_info.pdf]

## Supplementary Text

### Colocalization Macro

```
r thresholdUbi = 40;  
r thresholdMito = 20;  
r thresholdDAPI = 6;
```

```
roiManager("Reset");  
//get image attributes  
name = getInfo("image.filename  ");  
original = getImageID();  
originalTitle = getTitle();  
shortTitle= originalTitle  
CellROI="Cells.zip";  
  
//Set the directory where files will be pulled from and saved to  
DataDir=getDirectory("Choose the folder where data will be saved");  
run("8-bit");  
run("Duplicate...", "title=UbiImage duplicate channels=2");  
UbiImage = getImageID();  
UbiImageTitle = getTitle();  
changeValues(0, thresholdUbi, 0);  
  
//Mask on the Mitochondria  
selectImage(original);  
run("Duplicate...", "title=MitoImage duplicate channels=3");  
MitoImage = getImageID();  
MitoImageTitle = getTitle();  
run("Median...", "radius=1");  
changeValues(0, thresholdMito, 0); //KEY difference with non-norm macro  
/-->run("Convert to Mask", " black");  
rename("MitoMaskImage");  
MitoMaskImage = getImageID();  
MitoMaskTitle = getTitle();  
  
// divide image1 by image2  
run("Misc...", "divide=NaN"); //dividing by zero gives NaN  
imageCalculator("Divide create 32-bit", UbiImage, MitoMaskImage);  
rename("RatiolImage");  
RatiolImage = getImageID();  
RatiolImageTitle = getTitle();  
  
if (File.exists(DataDir + CellROI) == 1) open(DataDir + CellROI);  
else {  
selectImage(original);  
run("Duplicate...", "title=DAPI duplicate channels=1");  
setThreshold(thresholdDAPI, 255);  
//setAutoThreshold("Mean dark");  
run("Convert to Mask", " black");  
DAPIImage = getImageID();  
rename("DapiMaskImage");  
run("Watershed");  
run("Analyze Particles...", "size=40-100 clear include add");  
waitForUser("Delete squished cells");  
//Number cells  
ROICount=roiManager("Count");  
for (i=0; i<ROICount; i++) {  
roiManager("select", i);  
CellNumber=i+1;  
roiManager("Rename", "cell" + CellNumber);  
}  
}
```

```
roiManager("Save", DataDir+CellROI);
}
waitForUser("Note which are squished cells");
//Measure the cell ratios
run("Set Measurements...", "area mean standard integrated display redirect=None decimal=3");
selectImage(RatioImage);
roiManager("Deselect");
roiManager("Measure");
selectImage(UbiImage);
roiManager("Deselect");
roiManager("Measure");
i = nResults; // variable for counting, initialising with 0
setResult("Image name", i, originalTitle);
setResult("thresholdUbi", i, thresholdUbi); // add a "Label" column to the results table and name the entry "point1"
setResult("thresholdMito", i, thresholdMito);
setResult("thresholdDAPI", i, thresholdDAPI);
selectWindow("Results");
saveAs("Results", DataDir + shortTitle + ".xls");
}
```
